# Supplementary material
Source: ML conference proceedings conference paper supplement (https://openreview.net/forum?id=ZcuFDaMTYw)
Supplement: supplementary_material [file attachment]

## Abstract

In this supplement, we present the detailed proofs for the main theorems in the paper “Optimal testing using combined test statistics across independent studies”.

## A Appendix

The proofs of the main theorems (Theorem 1, 2 and 3) are divided over the subsections as follows. In Section A.1 the lower bounds of Theorem 1 and 3 are proven. Auxiliary lemmas for the proof of the lower bounds are proven in A.2. The attainability of the lower bound rates are given in Lemmas 6, 7 and 8 in Section A.4. In Section A.5 Lemmas 1 and 2 are proven.

### A.1 Proof of the lower bounds (Theorems 1 and 3)

The proof is based around the following idea. If  $C_m$  satisfies the continuity condition of Assumption 2, it implies  $C_m(S^{(1)}, \dots, S^{(m)})$  should not change to much if the statistics  $S^{(1)}, \dots, S^{(m)}$  are replaced by finite bit approximations. If  $b$  is the number of bits used for the approximation of  $S^{(j)}$ , we should be able to get an approximation with accuracy of the order  $2^{-b}$  through e.g. binary expansion. Since  $C_m$  and consequently the test based on  $C_m$  do not change (much) from passing to a finite bit approximation, tools and results from testing under bit-constrained communication apply, which finally yield the theorems.

*Proof.* We prove the statement for any  $\alpha \in (0, 1/10]$ . Since  $\alpha \mapsto \kappa_\alpha$  is strictly decreasing,  $\kappa_{1/8} < \kappa_{1/10} \leq \kappa_\alpha$  holds for any  $\alpha \in (0, 1/10]$ . Take  $0 < \epsilon < \frac{1}{2}(\kappa_{1/10} - \kappa_{1/8})$ . Then  $|x - \kappa_\alpha| \leq \epsilon$  implies  $x \geq \kappa_{1/8}$ , which by the definition of the quantile function provides

$$\mathbb{P}_0(|C_m(S) - \kappa_\alpha| \leq 2\epsilon) \leq 1/8. \quad (\text{S.1})$$

By Lemma 3 there exist  $B^{(j)}$ -bit binary approximations  $\tilde{S}^{(j)}$  such that

$$|S^{(j)} - \tilde{S}^{(j)}| \leq \left( \frac{\epsilon^{1/q}}{L^{1/qm}} \right)^{1/p} \quad (\text{S.2})$$

and

$$\mathbb{E}_0 B^{(j)} \leq \mathbb{E}_0 \log_2(|S^{(j)}|) \vee 0 - \frac{1}{p} \log \left( \frac{\epsilon^{1/q}}{L^{1/qm}} \right) + 3. \quad (\text{S.3})$$

Write  $\tilde{S} = (\tilde{S}^{(1)}, \dots, \tilde{S}^{(m)})$ . By combining Assumption 2 with (S.2),

$$|C_m(S) - C_m(\tilde{S})| \leq \epsilon.$$

Consequently,

$$\begin{aligned} \mathcal{R}(T_\alpha, H_\rho) &\geq \mathbb{P}_0 \left( C_m(\tilde{S}) - |C_m(S) - C_m(\tilde{S})| \geq \kappa_\alpha \right) \\ &\quad + \sup_{f \in H_\rho} \mathbb{P}_f \left( C_m(\tilde{S}) \leq \kappa_\alpha - |C_m(S) - C_m(\tilde{S})| \right) \\ &\geq \mathbb{P}_0 \left( C_m(\tilde{S}) \geq \kappa_\alpha + \epsilon \right) + \sup_{f \in H_\rho} \mathbb{P}_f \left( C_m(\tilde{S}) \leq \kappa_\alpha - \epsilon \right). \end{aligned}$$

Define the test

$$T'_\alpha := \mathbb{1} \left\{ C_m(\tilde{S}) > \kappa_\alpha - \epsilon \right\}.$$

Since

$$\mathbb{P}_0 \left( C_m(\tilde{S}) \geq \kappa_\alpha + \epsilon \right) = \mathbb{P}_0 \left( C_m(\tilde{S}) > \kappa_\alpha - \epsilon \right) - \mathbb{P}_0 \left( -\epsilon \leq C_m(\tilde{S}) - \kappa_\alpha \leq \epsilon \right),$$

the second last display can now be written as

$$\mathcal{R}(T', H_\rho) - \mathbb{P}_0 \left( |C_m(\tilde{S}) - \kappa_\alpha| \leq \epsilon \right).$$

Applying (3) again, using the reverse triangle inequality and (S.1), we obtain

$$\mathbb{P}_0 \left( |C_m(\tilde{S}) - \kappa_\alpha| \leq \epsilon \right) \leq \mathbb{P}_0 \left( |C_m(S) - \kappa_\alpha| \leq 2\epsilon \right) \leq 1/8.$$

It suffices to show that for  $\rho$  satisfying (5) in the case of Theorem I or  $\rho$  satisfying (11) in case of Theorem 3 for a small enough  $c > 0$ , we have

$$\mathcal{R}(T', H_\rho) \geq 7/8. \quad (\text{S.4})$$

This follows from Lemma 4 where it is left to verify that

$$\sum_{j=1}^m d \wedge \mathbb{E}_0 B^{(j)} \lesssim m(d \wedge (1 \vee \log m)) \quad (\text{S.5})$$

for a constant independent of  $d, n, m$  and  $c > 0$ . By (S.3) and  $\mathbb{E}_0 |S^{(j)}| \leq M$  for some constant  $M > 0$  for  $j = 1, \dots, m$  (following from Assumption 1 or 4), we obtain that  $\sum_{j=1}^m d \wedge \mathbb{E}_0 B^{(j)}$  is bounded by

$$m \left( d \wedge \left( \log_2(1 + M) + 3 - \frac{1}{p} \log \left( \frac{\epsilon^{1/q}}{L^{1/qm}} \right) \right) \right),$$

from which (S.5) follows. Putting things together, we now have that for  $c > 0$  small enough we obtain (S.4), from which we conclude that (S.4) holds and the proof of the theorems is concluded.  $\square$

## A.2 Auxiliary lemmas to the lower bound theorems

As a first tool, we introduce finite bit approximations of real numbers through their binary expansion. Consider the binary expansion of  $x \in \mathbb{R}$ ; i.e. there exist digits  $a_k(x), \dots, a_1(x), a_0(x) \in \{0, 1\}$  for a  $k_x \equiv k \in \mathbb{N} \cup \{0\}$  and  $(b_i(x))_{i \in \mathbb{N}} \in \{0, 1\}^{\mathbb{N}}$  such that

$$x = \text{sign}(x) \left( \sum_{i=0}^k 2^i a_i(x) + \sum_{i=1}^{\infty} 2^{-i} b_i(x) \right) \quad (\text{S.6})$$

with  $k$  the largest element in  $\mathbb{N} \cup \{0\}$  such that  $2^k - 1 \leq |x|$ . We now define  $\tilde{x}_B$  to be the  $B$ -bit binary expansion giving the smallest approximation error in absolute value, where the first bit encodes  $\text{sign}(x)$ . That is, for  $B \geq k + 2$ , we have

$$|x - \tilde{x}_B| \leq \sum_{i=B-k-1}^{\infty} 2^{-i} b_i(x). \quad (\text{S.7})$$

The following is well known, we exhibit its proof for completeness.

**Lemma 3.** *Let  $V$  be a random variable with a first moment. Given  $1 > \epsilon > 0$ , let  $B_\epsilon \equiv B$  denote the number of bits required such that*

$$|V - \tilde{V}_{B_\epsilon}| \leq \epsilon. \quad (\text{S.8})$$

*It holds that*

$$\mathbb{E}B \leq \mathbb{E} \log_2(|V|) \vee 0 + 1 + \log_2(1/\epsilon) + 2.$$

*Proof.* If  $|V| < 1$ , we have that

$$|V - \tilde{V}_B| \leq \sum_{i=B-1}^{\infty} 2^{-i} b_i(V).$$

So in the case that  $|V| \leq 1$ , since  $b_i(V) \in \{0, 1\}$ , for (S.8) to hold it suffices that  $B \geq \log_2(1/\epsilon) + 2$ . Let  $B'$  denote the amount of bits required to obtain  $|V - \tilde{V}_{B'}| \leq 1$ . When  $2^k \leq |V| < 2^{k+1}$ , it holds that  $B' \leq k + 1$ . Using Markov's inequality,

$$\begin{aligned} \mathbb{E}B' &= \mathbb{E}B' \sum_{k=0}^{\infty} \mathbb{1} \{2^k \leq |V| < 2^{k+1}\} \\ &\leq \mathbb{E} \sum_{k=0}^{\infty} (k+1) \mathbb{1} \{k \leq \log_2(|V|) < k+1\} \leq \mathbb{E} \log_2(|V|) \vee 0 + 1. \end{aligned}$$

In conclusion,  $\mathbb{E}B \leq \mathbb{E} \log_2(|V|) \vee 0 + 1 + \log_2(1/\epsilon) + 2$ .  $\square$

For the lemmas below, we introduce the following notation. Let  $\pi$  be a probability distribution on  $\mathbb{R}^d$ . Write  $\mathbb{P}_\pi := \int \mathbb{P}_f d\pi(f)$  for the mixture distribution, where  $\mathbb{P}_f$  denotes the joint distribution on  $X$ ,  $U$  and  $S$ . Let  $F$  denote the draw from  $\pi$ . Let  $\mathbb{P}_f^{\tilde{S}}$  denote the forward measure induced on the random variable  $\tilde{S}$  and let  $L_\pi^{\tilde{S}}$  denote the likelihood ratio of the mixture distribution and  $\mathbb{P}_0$ , ie

$$L_\pi^{\tilde{S}} = \int \frac{d\mathbb{P}_f^{\tilde{S}}}{d\mathbb{P}_0^{\tilde{S}}} d\pi(f). \quad (\text{S.9})$$

Because of the Markov chain structure of  $F \rightarrow (X, U) \rightarrow S$  and the independence between  $U$  and  $X$ , the joint distribution of  $(X, U, S)$  under the mixture disintegrates as

$$d\mathbb{P}_\pi^{X,U,S}(x, u, s) = \int d\mathbb{P}^{S|(X,U)}(s) d\mathbb{P}_f^X(x) d\mathbb{P}^U(u) d\pi(f) \quad (\text{S.10})$$

where  $\mathbb{P}^U$  is the marginal distribution of  $U$ . For the likelihood ratio conditionally on  $U = u$ , we shall write

$$L_\pi^{\tilde{S}|U=u} = \int \frac{d\mathbb{P}_f^{\tilde{S}|U=u}}{d\mathbb{P}_0^{\tilde{S}|U=u}} d\pi(f). \quad (\text{S.11})$$

Furthermore, by the independence of the statistics given  $U$ ,

$$d\mathbb{P}^{S|(X,U)} = \bigotimes_{j=1}^m d\mathbb{P}^{S^{(j)}|(X^{(j)}, U)}. \quad (\text{S.12})$$

Let  $\tilde{S}^{(j)}$  denote the  $B^{(j)}$ -bit binary approximations to  $S^{(j)}$  such that (S.2) holds. Note that the above displays are true for the random variable  $\tilde{S} = (\tilde{S}^{(1)}, \dots, \tilde{S}^{(m)})$  in place of  $S$  since  $F \rightarrow (X, U) \rightarrow S \rightarrow \tilde{S}$  forms a Markov chain as well. The following lemma allows us to bound the chi-square divergence between the forward measure for  $\tilde{S}$ , which we will denote by  $\mathbb{P}_\pi^{\tilde{S}}$  and  $\mathbb{P}_0^{\tilde{S}}$ .

The following lemma lower bounds the worst-case risk for any test  $T'$  depending only on  $\tilde{S}$ , the binary approximation of  $S$  as in (S.2).

**Lemma 4.** *Let  $T'$  be a test depending only on  $\tilde{S}$  taking values in  $\mathbb{R}^m$ , satisfying (S.10) and where  $\tilde{S}^{(j)}$  allows for an exact  $B^{(j)}$ -bit binary expansion as in (S.6), with  $\mathbb{E}_0 B^{(j)} < \infty$  for  $j = 1, \dots, m$ . There exists  $c > 0$  independent of  $n, m$  and  $d$  such that*

$$\mathcal{R}(T', H_\rho) \geq 7/8$$

for all  $n, m, d \in \mathbb{N}$  whenever

$$\sum_{j=1}^m d \wedge \mathbb{E}_0 B^{(j)} \lesssim m(d \wedge \log m) \quad (\text{S.13})$$

in addition to

$$\rho^2 \leq c \frac{(\sqrt{m} \wedge \frac{d}{\log(m)}) \sqrt{d}}{mn}, \quad (\text{S.14})$$

if  $\tilde{S}$  is generated using public randomness, or

$$\rho^2 \leq c \frac{(\sqrt{m} \wedge \sqrt{\frac{d}{\log(m)}}) \sqrt{d}}{mn}, \quad (\text{S.15})$$

in case  $\tilde{S}$  is generated using only local randomness.

*Proof.* Consider a probability distribution  $\pi$  on  $\mathbb{R}^d$  and  $L_\pi^{\tilde{S}}$  as in (S.9). Consider the set

$$D := \left\{ u : \sum_{j=1}^m d \wedge \mathbb{E}_0[B^{(j)}|U = u] \leq 64 \sum_{j=1}^m d \wedge \mathbb{E}_0 B^{(j)} \right\},$$

whose complement,  $D^c$ , has  $\mathbb{P}^U$ -mass less than or equal to  $1/64$  by Markov's inequality and  $\mathbb{E}^U(d \wedge \mathbb{E}_0[B^{(j)}|U]) \leq d \wedge \mathbb{E}_0 B^{(j)}$ . By conditioning on  $U$  (writing  $\mathbb{P}_0^{U=u} := \mathbb{P}_0(\cdot|U=u)$ ),

$$\begin{aligned} \mathcal{R}(T', H_\rho) &\geq \mathbb{P}_0 T' + \mathbb{P}_\pi(1 - T') - \pi(f \notin H_\rho) \\ &\geq \int \left( \mathbb{P}_0^{U=u}(T') + \mathbb{P}_\pi^{U=u}(1 - T') \right) \mathbb{1}_D(u) d\mathbb{P}^U(u) - \pi(f \notin H_\rho). \end{aligned}$$

Since  $0 \leq T' \leq 1$  and  $L_\pi^{\tilde{S}} \geq 0$ , for all  $0 < \gamma < 1$ ,

$$\begin{aligned} \mathbb{P}_0^{U=u}(T') + \mathbb{P}_\pi^{U=u}(1 - T') &\geq \mathbb{P}_0^{U=u} \left( \gamma T' + L_\pi^{\tilde{S}|U=u}(1 - T') \mathbb{1}_{\{L_\pi^{\tilde{S}|U=u} > \gamma\}} \right) \\ &\geq \gamma \mathbb{P}_0^{U=u} \left( L_\pi^{\tilde{S}|U=u} > \gamma \right) \\ &\geq \gamma (1 - \mathbb{P}_0^{U=u}(|L_\pi^{\tilde{S}|U=u} - 1| \geq 1 - \gamma)). \end{aligned}$$

The probability on the right hand side of the above display can be bounded by applying Chebyshev's inequality and bounding the resulting chi-square divergence using the tools of [40], in particular using Lemma 10.1 from the aforementioned paper. This lemma applies if  $\tilde{S}$  takes values in a space of finite, fixed cardinality.

Define  $B^* = \sum_{j=1}^m 64 \mathbb{E}_0 |B^{(j)}|$  and the event

$$A := \left\{ \sum_{j=1}^m B^{(j)} \leq B^* \right\},$$

so that  $A^c$  by Markov's inequality occurs with  $\mathbb{P}_0$ -probability less than  $1/64$ .

Let  $\check{S}^{(j)}$  be the  $\check{B}^{(j)} := B^{(j)} \wedge B^*$  binary approximation of  $\tilde{S}^{(j)}$  and note that on the event  $A$ ,  $\check{S}^{(j)} = \tilde{S}^{(j)}$ . We have

$$\begin{aligned} &\int \mathbb{P}_0^{U=u} \left( |L_\pi^{\tilde{S}|U=u} - 1| \geq 1 - \gamma \right) \mathbb{1}_D(u) d\mathbb{P}^U(u) \leq \\ &\int \mathbb{P}_0^{U=u} \left( \left\{ |L_\pi^{\tilde{S}|U=u} - 1| \geq 1 - \gamma \right\} \cap A \right) \mathbb{1}_D(u) d\mathbb{P}^U(u) + \mathbb{P}_0(A^c) \leq \\ &\int \mathbb{P}_0^{U=u} \left( |L_\pi^{\check{S}|U=u} - 1| \geq 1 - \gamma \right) \mathbb{1}_D(u) d\mathbb{P}^U(u) + 1/64, \end{aligned}$$

where  $\check{S} = (\check{S}^{(1)}, \dots, \check{S}^{(m)})$ . Using (S.10) and Chebyshev's inequality, it suffices to show that on the event  $D$ ,  $\mathbb{E}_0^{U=u} |L_\pi^{\check{S}|U=u} - 1|^2$  is smaller than  $\frac{1}{32}(1 - \gamma)^2$  for  $c$  small enough when  $\rho$  satisfies (S.14) or (S.15), some  $\gamma \geq 5/6$  for a specific choice of  $\pi$ . By Lemma 5, such a distribution  $\pi$  exists, satisfying  $\pi(f \notin H_\rho) \leq 1/32$ , as long as  $\text{Tr}(\Xi_u)$  can be sufficiently bounded, which can be done in terms of (S.3), as we will show next.

Let  $\mathcal{S}^{(j)}(b, u)$  be the space in which  $\check{S}^{(j)}|B^{(j)} = b, U = u$  takes values. Write

$$V_{s,u} = \mathbb{E}_0 \left[ X^{(j)} \middle| \check{S}^{(j)} = s, U = u \right].$$

We have

$$\begin{aligned} \Xi_u^j &= \sum_s V_{s,u} V_{s,u}^\top \mathbb{P}_0(\check{S}^{(j)} = s | U = u) \\ &= \sum_{b \in \mathbb{N}} \mathbb{P}_0(\check{B}^{(j)} = b | U = u) \sum_{s \in \mathcal{S}^j(b,u)} \mathbb{P}_0(\check{S}^{(j)} = s | \check{B}^{(j)} = b, U = u) V_{s,u} V_{s,u}^\top. \end{aligned}$$

By Lemma A.3 in [40], the trace of the matrix

$$\sum_{s \in \mathcal{S}^j(b,u)} \mathbb{P}_0 \left( \check{S}^{(j)} = s | \check{B}^{(j)} = b, U = u \right) V_{s,u} V_{s,u}^\top$$

is bounded by  $(2 \log(2) \frac{b}{d} \wedge 1) \frac{d}{n}$ . By linearity of the trace operation,

$$\begin{aligned} \text{Trace}(\Xi_u^j) &= \sum_{b \in \mathbb{N}} \mathbb{P}_0 \left( \check{B}^{(j)} = b | U = u \right) \left( 2 \log(2) \frac{b}{d} \wedge 1 \right) \frac{d}{n} \\ &\leq 2 \log(2) \frac{d \wedge \mathbb{E}_0[\check{B}^{(j)} | U = u]}{n} \end{aligned}$$

and consequently, since  $\check{B}^{(j)} \leq B^{(j)}$  and  $u \in D$ ,

$$\begin{aligned} \text{Trace} \left( \sum_{j=1}^m \Xi_u^j \right) &\leq 2 \log(2) n^{-1} \sum_{j=1}^m d \wedge \mathbb{E}_0 \left[ \check{B}^{(j)} | U = u \right] \\ &\leq 128 \log(2) n^{-1} \sum_{j=1}^m d \wedge \mathbb{E}_0 \left[ B^{(j)} \right]. \end{aligned}$$

The result follows after using that  $\rho^2$  satisfies (S.15) and (S.14) in the case of local or shared randomness protocols, respectively.  $\square$

**Lemma 5.** Let  $L_\pi^{\check{S}}$  be as defined through (S.9), with  $\check{S} = (\check{S}^{(1)}, \dots, \check{S}^{(m)})$  taking values in a space of finite cardinality. Let  $\Xi_u = \sum_{j=1}^m \Xi_u^j$  with

$$\Xi_u^j := \mathbb{E}_0^{U=u} \mathbb{E}_0 \left[ X^{(j)} \middle| \check{S}^{(j)}, U = u \right] \mathbb{E}_0 \left[ X^{(j)} \middle| \check{S}^{(j)}, U = u \right]^\top. \quad (\text{S.16})$$

Let  $\rho^2$  satisfy (S.14) or (S.15). For  $c > 0$  small enough (in (S.14) or (S.15)) there exists a probability distribution  $\pi$  on  $\mathbb{R}^d$  such that

$$\pi(f \notin H_\rho) \leq 1/32 \quad (\text{S.17})$$

and

$$\mathbb{E}_0^{U=u} |L_\pi^{\check{S}}|^{U=u} - 1|^2 \leq \exp \left( C \left( \frac{mn^2 \rho^4}{cd} + \frac{mn^3 \rho^4}{d^2 c} \text{Tr}(\Xi_u) \right) \right) - 1, \quad (\text{S.18})$$

for a constant  $C > 0$  that does not depend on  $d, n, m$  or  $c$ . Furthermore, in case of private coin randomness ( $U$  is degenerate), there exists a probability distribution  $\pi$  on  $\mathbb{R}^d$  such that (S.17) is satisfied and (the sharper bound)

$$\mathbb{E}_0 |L_\pi^{\check{S}} - 1|^2 \leq \exp \left( C \left( \frac{mn^2 \rho^4}{cd} + \frac{n^4 \rho^4}{d^3 c} \text{Tr}(\Xi_u)^2 \right) \right) - 1 \quad (\text{S.19})$$

holds for  $c > 0$  small enough.

*Proof.* This follows from the proof of Theorem 3.1 in [40] (where it is important to note that in the notation of [40], “ $n$ ” equals “ $nm$ ” in this article). For completeness, we highlight the main steps here. We start by noting that

$$\mathbb{E}_0^{U=u} |L_\pi^{\check{S}}|^{U=u} - 1|^2 = D_{\chi^2}(\mathbb{P}_0^{\check{S}}|^{U=u}; \mathbb{P}_\pi^{\check{S}}|^{U=u}).$$

Let  $\pi$  be a  $N(0, \Gamma)$ -distribution with  $\Gamma \in \mathbb{R}^{d \times d}$ . In view of the Markov chain structure (ie (S.10) and (S.12)), the Gaussianity of  $\pi$  and the fact that  $\check{B}^{(j)}$  is bounded for  $j = 1, \dots, m$ , we obtain through following the steps corresponding to displays (34) up until (42) in Section 9 of [40] that the above display is bounded by

$$\prod_{j=1}^m \mathbb{E}_0^{X^j|U=u} \left[ \mathcal{L}_\pi(X^j)^2 \right] \cdot \int e^{\frac{n^2}{m^2} f^\top \sum_{j=1}^m \Xi_u^j g} d(\pi \times \pi)(f, g) - 1, \quad (\text{S.20})$$

where  $\mathcal{L}_\pi(X^j) = \int \frac{d\mathbb{P}_f^{X^{(j)}}}{d\mathbb{P}_0^{X^{(j)}}} d\pi(f)$  and we note that Lemma 10.1 applies by the boundedness of  $\check{B}^{(j)}$  and Gaussianity of  $\pi$ . Taking  $\Gamma \in \mathbb{R}^{d \times d}$  equal to

$$\frac{\rho}{c^{1/4} \sqrt{d}} \bar{\Gamma}$$

for a symmetric idempotent  $d \times d$  matrix  $\bar{\Gamma}$  with rank (proportional to)  $d$ , we obtain (S.17) for  $c > 0$  small enough (Lemma A.13 in [40]). Following the second step of the proof of Section 9 in [40], in particular the steps corresponding to displays (43) and (44), we obtain that (S.20) is bounded by

$$\exp \left( C \left( \frac{mn^2 \rho^4}{cd} + \frac{n^4 \rho^4}{d^2 c} \text{Tr} \left( (\sqrt{\bar{\Gamma}} \Xi_u \sqrt{\bar{\Gamma}})^2 \right) \right) \right) - 1$$

for some fixed constant  $C > 0$  independent of  $d, n, m$  and  $\rho$ . The shared randomness bound of (S.18) now follows by choosing of  $\bar{\Gamma} = I_d$  and using that  $\text{Tr}(A^\top A) \leq \|A\| \text{Tr}(A)$  where  $\|A\|$  is the operator norm of  $A$ , as well as by the fact that  $\Xi_u \leq \frac{m}{n} I_d$  (see Lemma A.2 in [40]). In case of private randomness, we can assume that  $U$  is degenerate, so  $\Xi_u = \Xi$  for  $\mathbb{P}^U$ -almost every  $u$ . The matrix  $\Xi$  is positive definite and symmetric, therefore it possesses a spectral decomposition  $V^\top \text{Diag}(\xi_1, \dots, \xi_d) V$ . Assuming that  $\xi_1 \geq \xi_2 \geq \dots \geq \xi_d$  with corresponding eigenvectors  $V = (v_1 \dots v_d)$ , let  $\check{V}$  denote the  $d \times \lceil d/2 \rceil$  matrix  $(v_{\lfloor d/2 \rfloor + 1} \dots v_d)$ . The bound of (S.19) now follows by setting  $\bar{\Gamma} = \check{V} \check{V}^\top$ , for a detailed computation, see page 23 of [40].  $\square$

### A.3 Theorem concerning necessity of signs

The theorem below tells us that in order to attain the rate of  $\frac{d}{nm}$ , the statistics  $S^{(j)}$  need to contain at least *some* information on the signs of  $X^{(j)}$ , in the sense that  $\sqrt{d}/(\sqrt{mn})$  is the rate that can be attained at best when  $S^{(j)}$  is measurable with respect to the absolute values of the coordinates of  $X^{(j)}$ . This is in particular the case for statistics based on e.g. the norm  $\|X^{(j)}\|_2$  or rotation invariant statistics such as the worst-case growth rate optimal e-values (see e.g. [22]), which consequently attain the rate  $\frac{\sqrt{d}}{\sqrt{mn}}$  at best and are thus suboptimal when  $d$  is small compared to  $m$ .

**Theorem 4.** *Suppose that  $S^{(j)} = f_j(X^{(j)}, U)$  is such that  $S^{(j)}$  is measurable with respect to  $\sigma(U, (|X_1^{(j)}|, \dots, |X_d^{(j)}|))$  for  $j = 1, \dots, m$ . Then, for any  $\alpha \in (0, 0.1]$  there exists  $c > 0$  such that*

$$\sup_{f \in H_\rho} \mathbb{P}_f(T_\alpha = 0) \geq 3/4. \quad (\text{S.21})$$

whenever

$$\rho^2 \leq c \frac{\sqrt{d}}{\sqrt{mn}}. \quad (\text{S.22})$$

*Proof.* In view of Lemma 4 and the proof of the main theorems in A.1, it suffices to bound the trace of  $\Xi_u$  in (S.19) and (S.18) in Lemma 5 (the first term in the exponent is controlled by (S.22)). By assumption on  $S^{(j)}$ , we have

$$\sigma(S^{(j)}, U, (|X_1^{(j)}|, \dots, |X_d^{(j)}|)) = \sigma(U, (|X_1^{(j)}|, \dots, |X_d^{(j)}|)), \quad (\text{S.23})$$

which implies that the sign( $X_i^{(j)}$ ) is independent of  $\sigma(S^{(j)}, U, (|X_1^{(j)}|, \dots, |X_d^{(j)}|))$ . Writing  $X_i^{(j)} = \text{sign}(X_i^{(j)})|X_i^{(j)}|$ , we obtain that

$$\begin{aligned} \mathbb{E}_0 \left[ X^{(j)} \middle| S^{(j)}, U = u \right] &= \left( \mathbb{E}_0 \left[ \text{sign}(X_i^{(j)}) |X_i^{(j)}| \middle| S^{(j)}, U = u \right] \right)_{1 \leq i \leq d} \\ &= \left( \mathbb{E}_0 \text{sign}(X_i^{(j)}) \mathbb{E}_0 \left[ |X_i^{(j)}| \middle| S^{(j)}, U = u \right] \right)_{1 \leq i \leq d} = 0, \end{aligned}$$

where the second last inequality follows from the fact that sign( $X_i^{(j)}$ ) is independent of the sigma algebra in (S.23) and the final equality by the symmetry of the Gaussian distribution around the mean. Following the proof of Theorem 1 with  $\Xi_u = 0$ , we obtain that the testing risk is bounded from below whenever  $\rho^2 \lesssim \frac{\sqrt{d}}{\sqrt{mn}}$ .  $\square$

### A.4 Lemmas related to rate attainability

**Lemma 6.** *Let  $T_\alpha$  correspond to a test of level  $\alpha$  based on Edginton's method based for  $p$ -values  $p^{(j)} = \chi_d^2(\|\sqrt{n}X^{(j)}\|_2^2)$  or simply the sum of  $\|\sqrt{n}X^{(j)}\|_2^2$ . For all  $\alpha, \beta \in (0, 1)$  if*

$$\rho^2 \geq C_{\alpha, \beta} \frac{\sqrt{d}}{\sqrt{mn}} \quad (\text{S.24})$$

we have

$$\sup_{f \in H_\rho} \mathbb{P}_f(T_\alpha = 0) \leq \beta$$

for  $d \geq C_{\alpha,\beta}m$  a large enough constant  $C_{\alpha,\beta}$  depending only on  $\alpha, \beta \in (0, 1)$ . The above result holds for Fisher's method also, under the additional assumption that  $\log(m) \lesssim \sqrt{d}$ .

*Proof.* The test in (7) has level  $\alpha$  under the null hypothesis. Under the alternative hypothesis,

$$\|\sqrt{n}X^{(j)}\|_2^2 \stackrel{d}{=} n\|f\|_2^2 + 2\sqrt{n}(Z^{(j)})^\top f + \|Z^{(j)}\|_2^2,$$

where  $Z^{(j)} \sim N(0, I_d)$ . Rearranging, the test  $T_\alpha$  of (7) can be seen to equal

$$\mathbb{1} \left\{ 2 \frac{\sqrt{n}}{\sqrt{d}} \left( m^{-1/2} \sum_{j=1}^m Z^{(j)} \right)^\top f + \frac{1}{\sqrt{md}} \sum_{j=1}^m \left( \|Z^{(j)}\|_2^2 - d \right) \geq \eta_{d,m} - \frac{\sqrt{mn}}{\sqrt{d}} \|f\|_2^2 \right\} \quad (\text{S.25})$$

in distribution under  $\mathbb{P}_f$ , with

$$\eta_{d,m} := \frac{1}{\sqrt{dm}} \left( F_{\chi_{dm}^2}^{-1}(1 - \alpha) - md \right).$$

By Lemma 9,  $\eta_{d,m} \rightarrow \Phi^{-1}(1 - \alpha)$  as both or either  $d, m \rightarrow \infty$ , so  $\eta_{d,m}$  is bounded in  $d$  and  $m$ . Consequently,  $\mathbb{P}_f(1 - T_\alpha)$  equals

$$\Pr \left( \left( 1 + \frac{\sqrt{n}}{\sqrt{d}} \|f\|_2 \right) O_P(1) \leq \eta_{d,m} - \frac{\sqrt{mn}}{\sqrt{d}} \|f\|_2^2 \right)$$

as the left hand side of the test in (S.25) is mean 0 and has constant variance. Since  $\|f\|_2^2 \geq C_{\alpha,\beta} \frac{\sqrt{d}}{\sqrt{mn}}$ , the latter display can be bounded from above by

$$\Pr \left( \left( 1 + \frac{\sqrt{n}}{\sqrt{d}} \|f\|_2 \right) O_P(1) \leq -\frac{\sqrt{mn}}{2\sqrt{d}} \|f\|_2^2 \right)$$

for a large enough  $C_{\alpha,\beta}$ . The latter display is smaller than  $\beta$  for  $C_{\alpha,\beta} > 0$  large enough depending only on  $\alpha$  and  $\beta$ .

For Edgington's method, one can take  $p^{(j)} = 1 - F_{\chi_d^2}(\|\sqrt{n}X^{(j)}\|_2^2)$  and compute the test

$$T_\alpha := \mathbb{1} \left\{ m^{-1/2} \zeta_{\alpha,m} \sum_{j=1}^m (p^{(j)} - \frac{1}{2}) \geq 12^{-1/2} \Phi^{-1}(1 - \alpha) \right\}, \quad (\text{S.26})$$

where  $\zeta_{\alpha,m} \rightarrow 1$  in  $m$  is such that  $\mathbb{P}_0 T_\alpha = \alpha$ , by Lemma 9.

Under the alternative,  $\mathbb{E}_f p^{(j)} = \Pr(\|\sqrt{n}f + Z^{(j)}\|_2^2 \leq \chi_d^2)$ . Therefore, by Lemma 4 in [39],

$$\mathbb{E}_f p^{(j)} \geq \frac{1}{2} + \frac{1}{40} \left( d^{-1/2} n \|f\|_2^2 \wedge \frac{1}{2} \right),$$

where we note that we can take  $d$  larger than an arbitrary constant as the rate  $\sqrt{d}/(\sqrt{mn})$  being optimal ( $\sqrt{d}/(\sqrt{mn}) \lesssim d/(mn)$ ) implies  $d \gtrsim m$  and for constant order  $m$  there is nothing to prove. We obtain that

$$\begin{aligned} \mathbb{P}_f(1 - T_\alpha) &= \mathbb{P}_f \left( \frac{\zeta_{m,\alpha}}{\sqrt{m}} \sum_{j=1}^m (p^{(j)} - 1/2) \leq 12^{-1/2} \Phi^{-1}(1 - \alpha) \right) \\ &= \mathbb{P}_f \left( \frac{\zeta_{m,\alpha}}{\sqrt{m}} \sum_{j=1}^m [(p^{(j)} - \mathbb{E}_f p^{(j)}) + \mathbb{E}_f p^{(j)} - \frac{1}{2}] \leq 12^{-1/2} \Phi^{-1}(1 - \alpha) \right) \\ &\leq \Pr \left( O_P(1) + \frac{\zeta_{m,\alpha} \sqrt{m}}{40} \left( d^{-1/2} n \|f\|_2^2 \wedge \frac{1}{2} \right) \leq 12^{-1/2} \Phi^{-1}(1 - \alpha) \right), \end{aligned}$$

where the  $O_P(1)$  term in last equality follows from the fact that  $\zeta_{m,\alpha}$  is bounded and the central limit theorem (the  $p^{(j)}$ 's are bounded and independent still under  $\mathbb{P}_f$ ). If the minimum is taken in  $1/2$ , the result follows for large enough  $m$ . If the minimum is taken in the first argument,

$$\frac{\zeta_{m,\alpha}\sqrt{m}}{40} \left( d^{-1/2} n \|f\|_2^2 \wedge \frac{1}{2} \right) \geq \frac{C_{\alpha,\beta}\zeta_{m,\alpha}}{40}$$

so for large enough  $C_{\alpha,\beta}$ , we obtain that  $\mathbb{P}_f(1 - T_\alpha) \leq \beta$ .

For Fisher's method, the test of level  $\alpha$  is given by

$$T_\alpha := \mathbb{1} \left\{ \sum_{j=1}^m -2 \log p^{(j)} \geq F_{\chi_{2m}^2}^{-1}(1 - \alpha) \right\}, \quad (\text{S.27})$$

for the p-value  $p^{(j)} := 1 - F_{\chi_d^2}(\|\sqrt{n}X^{(j)}\|_2^2)$  (or equivalently Pearson's method for the p-value  $F_{\chi_d^2}(\|\sqrt{n}X^{(j)}\|_2^2)$ ).

For the Type II error bound, assume first that  $n\|f\|_2^2 \geq 20\sqrt{d}$ . We have that  $\|Z^{(j)}\|_2^2 \geq d - 5\sqrt{d}$  on an event of probability at least  $1 - e^{-5}$ , via e.g. Theorem 3.1.1 in [46]. By using a union and a standard Gaussian concentration inequality, the event

$$\max_{1 \leq j \leq m} \left| 2 \frac{\sqrt{n}}{\sqrt{d}} f^\top Z^{(j)} \right| \leq \frac{n}{2\sqrt{d}} \|f\|_2^2, \quad (\text{S.28})$$

has mass at least  $1 - me^{-n\|f\|_2^2/32} \geq 1 - me^{-\sqrt{d}/2}$ . On the intersection of these two events,

$$\begin{aligned} F_{\chi_d^2}(\|\sqrt{n}f + Z^{(j)}\|_2^2) &= \Pr \left( \frac{\chi_d^2 - \|Z^{(j)}\|_2^2}{\sqrt{d}} \leq 2 \frac{\sqrt{n}}{\sqrt{d}} f^\top Z^{(j)} + \frac{n}{\sqrt{d}} \|f\|_2^2 \right) \\ &\geq \Pr \left( \frac{\chi_d^2 - d}{\sqrt{d}} \leq \frac{n}{2\sqrt{d}} \|f\|_2^2 - 5 \right) \\ &\geq \Pr \left( \frac{\chi_d^2 - d}{\sqrt{d}} \leq 5 \right), \end{aligned}$$

where the right-hand side tends to  $\Phi(5)$  in  $d$  by the central limit theorem. As  $\Phi(5) > e^{-2}$ , we obtain  $-\log p^{(j)} \geq 2$ . Since  $Z^{(1)}, \dots, Z^{(m)}$  are independent, by binomial concentration, there are at least  $(3/4)m$  indexes  $j = 1, \dots, m$  such that  $\|Z^{(j)}\|_2^2 \geq d - 5\sqrt{d}$  whilst also satisfying (S.28) with probability  $1 - e^{-\tau m} - me^{-\sqrt{d}/2}$  for some constant  $\tau > 0$ . Using that we can without loss of generality take  $m \geq M_{\alpha,\beta}$  for a constant  $M_{\alpha,\beta} > 0$  (otherwise the separation rate is effectively the same the one for  $m = 1$ ) and since we consider  $d \gtrsim m$ , we obtain that the event the joint event occurs has mass less than  $1 - \beta$ . Furthermore, on this event, we have  $1 - T_\alpha = 0$  for  $M_{\alpha,\beta} > 0$  large enough, since

$$\sum_{j=1}^m -2 \log p^{(j)} \geq 4m \cdot (3/4)$$

and by the fact that the chi-square quantile tends to  $2m + C_\alpha \sqrt{2m}$  for some constant only depending on  $\alpha$ , which is less than  $4m \cdot (3/4) = 3m$  for  $m \geq M_{\alpha,\beta}$ .

Assume now that  $n\|f\|_2^2 \leq 20\sqrt{d}$ . Consider the following claim: for  $d$  large enough it holds that

$$-2\mathbb{E}_f \log \left( 1 - F_{\chi_d^2}(\|\sqrt{n}f + Z^{(j)}\|_2^2) \right) \geq 2 - e^{-\sqrt{d}/4} + \frac{n\|f\|_2^2}{C\sqrt{d}} \quad (\text{S.29})$$

for a fixed constant  $C > 0$ . If the claim holds,

$$\mathbb{P}_f(1 - T_\alpha) \leq \mathbb{P}_f \left( \frac{\sqrt{mn}\|f\|_2^2}{C\sqrt{d}} - \sqrt{m}e^{-c\sqrt{d}} + \frac{1}{\sqrt{m}} \sum_{j=1}^m -2(\log p^{(j)} - \mathbb{E}_f \log p^{(j)}) \leq \eta_{m,\alpha} \right)$$



with  $\eta_{m,\alpha} := \frac{1}{\sqrt{2m}}(F_{\chi_{2m}^2}^{-1}(1-\alpha) - 2m)$ . Since the method is rate optimal when  $m \lesssim d$ , the second term of the LHS in the above display may be assumed to be small. For the third term, note that

$$\begin{aligned}\mathbb{E}_f(-2\log p^{(j)})^2 &= 4\mathbb{E}_f \log(1 - F_{\chi_d^2}(\|\sqrt{n}f + Z^{(j)}\|_2^2)) \\ &\leq 4\log(1 - F_{\chi_d^2}(n\|f\|_2^2 + d)),\end{aligned}$$

where the last inequality follows from the log-concavity of  $x \mapsto 1 - F_{\chi_d^2}(x)$  (see e.g. Theorem 3.4 in [17]). For  $n\|f\|_2^2 \leq 20\sqrt{d}$ , the latter quantity is uniformly bounded in  $n, m$  and  $d$ . Since the second moment bounds the variance, this implies that

$$\frac{1}{\sqrt{m}} \sum_{j=1}^m -2(\log p^{(j)} - \mathbb{E}_f \log p^{(j)}) = O_P(1)$$

by the independence of  $p^{(j)}$  and  $p^{(k)}$  for  $k \neq j$ . Consequently, for some constant  $\tau > 0$ ,

$$\mathbb{P}_f(1 - T_\alpha) \leq \Pr\left(\frac{\sqrt{mn}\|f\|_2^2}{C\sqrt{d}} - \sqrt{m}e^{-\tau\sqrt{d}} + O_P(1) \leq \eta_{m,\alpha}\right).$$

Since  $\eta_{m,\alpha} \rightarrow \Phi^{-1}(1-\alpha)$  by Lemma 9 the fact that

$$\frac{\sqrt{mn}\|f\|_2^2}{C\sqrt{d}} \geq C_{\alpha,\beta}/C$$

for large enough  $C_{\alpha,\beta} > 0$  depending only on  $\alpha$  and  $\beta$  and the fact that  $m \lesssim d$ , we have that  $\mathbb{P}_f(1 - T_\alpha) \leq \beta$ .

It remains to prove the claim of (S.29). We start by writing  $-2\mathbb{E}_f \log(p^{(j)})$  as

$$-2\mathbb{E}_f \log(1 - F_{\chi_d^2}(\|Z^{(j)}\|_2^2)) - 2\mathbb{E}_f \log\left(\frac{1 - F_{\chi_d^2}(\|\sqrt{n}f + Z^{(j)}\|_2^2)}{1 - F_{\chi_d^2}(\|Z^{(j)}\|_2^2)}\right).$$

The first term equals 2. Using  $\log(x) \leq |x - 1|$ , the second term is bounded from below by

$$2\mathbb{E}_f \left| \frac{F_{\chi_d^2}(\|\sqrt{n}f + Z^{(j)}\|_2^2) - F_{\chi_d^2}(\|Z^{(j)}\|_2^2)}{1 - F_{\chi_d^2}(\|Z^{(j)}\|_2^2)} \right| \geq 2\mathbb{E}_f \left| F_{\chi_d^2}(\|\sqrt{n}f + Z^{(j)}\|_2^2) - F_{\chi_d^2}(\|Z^{(j)}\|_2^2) \right|.$$

By the same argument as used for (S.28),

$$\mathbb{E}_f \mathbb{1}_{\{f^\top Z^{(j)} < 0\}} F_{\chi_d^2}(\|\sqrt{n}f + Z^{(j)}\|_2^2) \geq \mathbb{E}_f F_{\chi_d^2}(\frac{1}{2}\|\sqrt{n}f\|_2^2 + \|Z^{(j)}\|_2^2) - e^{-\sqrt{d}/4},$$

which is larger than  $\mathbb{E}_f F_{\chi_d^2}(\|Z^{(j)}\|_2^2)$  for all large enough  $d$ . Additionally, on the event that  $f^\top Z^{(j)} \geq 0$ , it holds that

$$F_{\chi_d^2}(\|\sqrt{n}f + Z^{(j)}\|_2^2) \geq \mathbb{E}_f F_{\chi_d^2}(\frac{1}{2}\|\sqrt{n}f\|_2^2 + \|Z^{(j)}\|_2^2) \geq \mathbb{E}_f F_{\chi_d^2}(\|Z^{(j)}\|_2^2).$$

Furthermore, we have

$$\mathbb{E}_f F_{\chi_d^2}(\frac{1}{2}\|\sqrt{n}f\|_2^2 + \|Z^{(j)}\|_2^2) - \mathbb{E}_f F_{\chi_d^2}(\|Z^{(j)}\|_2^2) = \Pr\left(0 \leq \frac{\chi_d^2 - \tilde{\chi}_d^2}{\sqrt{d}} \leq \frac{n}{2\sqrt{d}}\|f\|_2^2\right),$$

where  $\chi_d^2, \tilde{\chi}_d^2$  are independent chi square random variables with  $d$  degrees of freedom, which tends in  $d$  to

$$\Phi\left(\frac{n}{2\sqrt{d}}\|f\|_2^2\right) - \Phi(0) \geq \frac{n}{C\sqrt{d}}\|f\|_2^2,$$

where the inequality holds under the assumption  $n\|f\|_2^2 \leq 20\sqrt{d}$  for a large enough constant  $C > 0$ . Putting the above lower bounds together, we obtain (S.29).  $\square$

**Lemma 7.** Let  $T_\alpha$  correspond to a test of level  $\alpha$  considered in (8) or (9). For all  $\alpha, \beta \in (0, 1)$  if

$$\rho^2 \geq C_{\alpha,\beta} \frac{d^{3/2}}{mn} \tag{S.30}$$

we have

$$\sup_{f \in H_\rho} \mathbb{P}_f(T_\alpha = 0) \leq \beta$$

for a large enough constant  $C_{\alpha,\beta}$  depending only on  $\alpha, \beta \in (0, 1)$ .

*Proof.* The proof follows a similar line of reasoning as e.g. the proof of Lemma A.8 in [40]. Starting with [8], note that

$$\mathbb{P}_f(1 - T_\alpha) = \Pr\left(\frac{1}{\sqrt{d}} \sum_{i=1}^d \left((d^{-1/2} \sqrt{mn} f_i + Z_i)\right)^2 \leq d^{-1/2} F_{\chi_d^2}^{-1}(1 - \alpha)\right)$$

for independent  $Z_1, \dots, Z_d \sim N(0, 1)$ . The latter display equals

$$\begin{aligned} \Pr\left(\frac{nm}{d\sqrt{d}} \|f\|_2^2 + 2\frac{\sqrt{mn}}{d} \sum_{i=1}^d f_i Z_i + \frac{1}{\sqrt{d}} \sum_{i=1}^d (Z_i^2 - 1) \leq d^{-1/2} (F_{\chi_d^2}^{-1}(1 - \alpha) - d)\right) = \\ \Pr\left(\frac{nm}{d\sqrt{d}} \|f\|_2^2 + (1 + \sqrt{\frac{nm}{d^2}} \|f\|_2) O_P(1) \leq d^{-1/2} (F_{\chi_d^2}^{-1}(1 - \alpha) - d)\right) \leq \\ \Pr\left((1 + \sqrt{\frac{nm}{d^2}} \|f\|_2) O_P(1) \leq -\frac{1}{2} \frac{nm}{d\sqrt{d}} \|f\|_2^2\right), \end{aligned}$$

where the last inequality holds for large enough  $C_{\alpha, \beta}$  since  $\frac{nm}{d\sqrt{d}} \|f\|_2^2 \geq C_{\alpha, \beta}$  and  $d^{-1/2} (F_{\chi_d^2}^{-1}(1 - \alpha) - d)$  is bounded in  $d$  by Lemma 9. The resulting probability can be made arbitrarily small by taking large enough  $C_{\alpha, \beta}$ .

For a variation to Edgington's method, ie [9], similar reasoning applies. Under the null hypothesis,  $\mathbb{E}_0 \Phi(\sqrt{n} X^{(j)}) = 1/2$ , so a conservative test (i.e.  $\mathbb{P}_0 T_\alpha \leq \alpha$ ) based on Edgington's method is given by

$$T_\alpha = \mathbb{1} \left\{ \left| \frac{1}{\sqrt{d}} \sum_{i=1}^d \left[ \frac{d}{m} \left( \sum_{j \in \mathcal{J}_i} (p^{(j)} - \frac{1}{2}) \right)^2 - \text{Var}_0(p^{(j)}) \right] \right| \geq c\alpha^{-1/2} \right\}$$

for a constant  $c > 0$  by e.g. Chebyshev's inequality. Under the alternative hypothesis, we have  $p^{(j)} = \Phi(\sqrt{n} X_i^{(j)}) = \Phi(\sqrt{n} f_i + Z_i^{(j)})$  whenever  $j \in \mathcal{J}_i$ . The Type II error  $\mathbb{P}_f(1 - T_\alpha)$  equals

$$\begin{aligned} \mathbb{P}_f \left( \left| \frac{1}{\sqrt{d}} \sum_{i=1}^d \left[ \frac{d}{m} \left( \sum_{j \in \mathcal{J}_i} (p^{(j)} - \Phi(Z_i^{(j)})) + \Phi(Z_i^{(j)}) - \frac{1}{2} \right)^2 - \text{Var}_0(p^{(j)}) \right] \right| \leq c\alpha^{-1/2} \right) = \\ \mathbb{P}_f \left( \left| \zeta + \xi + \frac{1}{\sqrt{d}} \sum_{i=1}^d \frac{d}{m} \left( \sum_{j \in \mathcal{J}_i} (\Phi(\sqrt{n} f_i + Z_i^{(j)}) - \Phi(Z_i^{(j)})) \right)^2 \right| \leq c\alpha^{-1/2} \right) \quad (\text{S.31}) \end{aligned}$$

where

$$\zeta = \frac{1}{\sqrt{d}} \sum_{i=1}^d \left[ \frac{d}{m} \left( \sum_{j \in \mathcal{J}_i} (\Phi(Z_i^{(j)}) - \frac{1}{2}) \right)^2 - \text{Var}_0(p^{(j)}) \right]$$

and

$$\xi = \frac{2\sqrt{d}}{m} \sum_{i=1}^d \left( \sum_{j \in \mathcal{J}_i} (\Phi(\sqrt{n} f_i + Z_i^{(j)}) - \Phi(Z_i^{(j)})) \right) \left( \sum_{j \in \mathcal{J}_i} (\Phi(Z_i^{(j)}) - \frac{1}{2}) \right).$$

By independence between  $Z_i^{(j)}$  and  $Z_i^{(k)}$  when  $j \neq k$ , the random variable  $\zeta$  is mean 0 under  $\mathbb{E}_f$  with constant variance (i.e. not depending on  $d, m, n$ ) and is thus  $O_P(1)$ . Similarly,  $\xi$  has constant order variance and expectation. By Jensen's inequality

$$\mathbb{E}_f(\Phi(\sqrt{n} f_i + Z_i^{(j)}) - \Phi(Z_i^{(j)}))^2 \geq (\Phi(2^{-1/2} \sqrt{n} f_i) - \Phi(0))^2$$

where it is used that

$$\mathbb{E}_f(\Phi(\sqrt{n} f_i + Z_i^{(j)}) - \Phi(Z_i^{(j)})) = \Pr(\sqrt{n} f_i + Z \geq Z') = \Phi(2^{-1/2} \sqrt{n} f_i).$$

By Lemma A.11 in [40], the RHS of the second last display is lower bounded by  $\frac{1}{12} \min\{\frac{1}{2} n f_i^2, 1\}$ .

By the independence of  $Z_i^{(j)}$  and  $Z_i^{(k)}$  when  $j \neq k$ , it also holds that

$$\mathbb{E}_f(\Phi(\sqrt{n} f_i + Z_i^{(j)}) - \Phi(Z_i^{(j)}))(\Phi(\sqrt{n} f_i + Z_i^{(k)}) - \Phi(Z_i^{(k)})) = (\Phi(2^{-1/2} \sqrt{n} f_i) - \Phi(0))^2.$$

Therefore,

$$\mathbb{E}_f \frac{d}{m} \left( \sum_{j \in \mathcal{J}_i} (\Phi(\sqrt{n}f_i + Z_i^{(j)}) - \Phi(Z_i^{(j)})) \right)^2 \geq \frac{m}{12d} \min\{\frac{1}{2}nf_i^2, 1\}.$$

Adding and subtracting the above expectation and noting that

$$\frac{1}{\sqrt{d}} \sum_{i=1}^d \frac{d}{m} \left( \sum_{j \in \mathcal{J}_i} (\Phi(\sqrt{n}f_i + Z_i^{(j)}) - \Phi(Z_i^{(j)})) \right)^2$$

has constant variance by the independence of  $Z_i^{(j)}$  and  $Z_i^{(k)}$  when  $j \neq k$ , we obtain that (S.31) is bounded above by

$$\mathbb{P}_f \left( O_P(1) + \frac{m}{12d\sqrt{d}} \sum_{i=1}^d \min\{\frac{1}{2}nf_i^2, 1\} \leq c\alpha^{-1/2} \right).$$

If the minimum is taken by 1 for any  $i = 1, \dots, d$ , the proof is completed by noting that  $m \gtrsim d^2$  by assumption whenever the rate  $\frac{d\sqrt{d}}{nm}$  is the optimal rate and considering  $m$  large enough. Otherwise, the power is arbitrarily small for

$$\frac{mn}{d\sqrt{d}} \|f\|_2^2 \geq C_{\alpha,\beta}$$

and  $C_{\alpha,\beta}$  large enough.  $\square$

**Lemma 8.** Let  $T_\alpha$  correspond to a test of level  $\alpha$  considered in (I3). For all  $\alpha, \beta \in (0, 1)$  if

$$\rho^2 \geq C_{\alpha,\beta} \frac{d}{mn} \tag{S.32}$$

we have

$$\sup_{f \in H_\rho} \mathbb{P}_f (T_\alpha = 0) \leq \beta$$

for a large enough constant  $C_{\alpha,\beta}$  depending only on  $\alpha, \beta \in (0, 1)$ .

*Proof.* The proof follows a similar line of reasoning as e.g. the proof of Lemma A.7 in [40]. For any  $f \in \mathbb{R}^d$  such that  $\|f\|_2 \geq \rho$ , we have

$$U\sqrt{n}X^{(j)} \stackrel{d}{=} \sqrt{n}Uf + Z^{(j)}$$

under  $\mathbb{P}_f$  by rotational invariance of the normal distribution. The probability of a Type II error of the test of level  $\alpha$  given in (I3) is then equal to

$$\Pr(|\sqrt{n}\sqrt{m}(Uf)_1 + Z| \leq \Phi^{-1}(1 - \alpha/2)),$$

with  $Z \sim N(0, 1)$ . The random variable  $(Uf)_1$  is in distribution equal to  $\|f\|_2 Z'_1 / \|Z'\|_2$  for a  $d$ -dimensional standard Gaussian random vector  $Z'$ . For any  $\beta \in (0, 1)$ , there exists  $c' > 0$  such that  $\|Z'\|_2 > c'\sqrt{d}$  occurs with probability  $1 - \beta/2$ . Also, for  $\frac{\sqrt{nm}\|f\|_2}{c'\sqrt{d}} \geq C_{\alpha,\beta}/c'$  large enough,

$$\Pr\left(\left|\frac{\sqrt{nm}\|f\|_2}{c'\sqrt{d}} + Z\right| \leq \Phi^{-1}(1 - \alpha/2)\right) \leq \beta/2.$$

This concludes the proof of the lemma.  $\square$

The following fact is well known and included for completeness. For a random variable  $V$ , let  $F_V$  denote its CDF.

**Lemma 9.** Let  $W_1, \dots, W_m$  be random variables and let  $V_m = \sum_{j=1}^m W_j$ . Suppose that

$$m^{-1/2} \sum_{j=1}^m (W_j - \mathbb{E}W_j) \rightsquigarrow N(0, \sigma^2).$$

Then, for all  $\alpha \in (0, 1)$ ,

$$(\sigma^2 m)^{-1/2} \left( F_{V_m}^{-1}(\alpha) - \sum_{j=1}^m \mathbb{E}W_j \right) \rightarrow \Phi^{-1}(\alpha),$$

where  $\Phi$  is the standard Gaussian CDF.

*Proof.* The quantile function

$$F_{V_m}^{-1}(\alpha) = \inf \{x \in \mathbb{R} : \Pr(V_m \leq x) \geq \alpha\}$$

satisfies  $z(F_{V_m}^{-1}(\alpha) - y) = F_{z(V_m - y)}^{-1}(\alpha)$ . The result now follows by e.g. Lemma 21.2 in [44].  $\square$

## A.5 Proof Lemma 1 and Lemma 2

*Proof of Lemma 1* The lemma directly follows from Theorem 1 and Theorem 3 after verifying the corresponding conditions. Assumption 1 is satisfied if  $p^{(j)}$  is generated using only local randomness, while in case of shared randomness, the same conclusion holds for Assumption 4. Below, we prove Assumptions 2 and 3 for the examples listed in the lemmas.

1. Fisher's method: let  $S^{(j)} = -2 \log p^{(j)} \sim^{H_0} \chi_2^2$  and consider the test of level  $\alpha$  as

$$\mathbb{1} \left\{ \eta_{\alpha, m} \frac{1}{\sqrt{2m}} \sum_{j=1}^m (S^{(j)} - 2) \geq \Phi^{-1}(1 - \alpha) \right\}$$

with  $\Phi^{-1}$  the inverse standard normal CDF and

$$\eta_{\alpha, m} := \Phi^{-1}(1 - \alpha) \left( \frac{1}{\sqrt{2m}} \left( F_{\chi_{2m}^2}^{-1}(1 - \alpha) - 2m \right) \right)^{-1}.$$

In view of the CLT, see Lemma 9, the sequence  $\eta_{\alpha, m}$  converges to one, hence it is bounded. Furthermore, note that the corresponding combination function  $C_m(s) := (\eta_{\alpha, m} / \sqrt{m}) \sum_{j=1}^m (s_j - 1)$  with  $s = (s_j) \in \mathbb{R}^m$  satisfies Assumption 2 (e.g. with  $p = q = 1$ ). This in turn implies the moment condition for  $S^{(j)}$ , concluding the proof.

2. Mudholkar and George's method: The corresponding combination function  $C_m(s) := |m^{-1/2} \sum_{j=1}^m s_j|$ , by triangle inequality, satisfies Assumption 4. Since  $S^{(j)} := -\log(p^{(j)}(1 - p^{(j)}))$ , the moment conditions are also satisfied.
3. Pearson's and Edgington's methods: the proofs follow the same reasoning as above with an additional application of the reverse triangle inequality in case of a two sided test.
4. Tippett's method: when small p-values are expected under the alternative hypothesis, a test of level  $\alpha \in (0, 1)$  is given by

$$T_\alpha = \mathbb{1} \left\{ 1 - (1 - \min\{p^{(1)}, \dots, p^{(m)}\})^m \leq \alpha \right\},$$

where  $1 - (1 - \min\{p^{(1)}, \dots, p^{(m)}\})^m$  is uniformly distributed under the null (see e.g. [42]). Observe that it is equivalent to

$$\mathbb{1} \left\{ -m \min \left\{ -\log(1 - p^{(j)}) \right\} \geq \log(1 - \alpha) \right\}.$$

For  $j = 1, \dots, m$ , take  $S^{(j)} = -\log(1 - p^{(j)}) \sim^{H_0} \text{Exp}(1)$ . The threshold  $\alpha \mapsto \log(1 - \alpha)$  is strictly decreasing and the combination function  $C_m(s) = -m \min s_j$  satisfies

$$|C_m(s) - C_m(s')| \leq m \min |s_j - s'_j| \leq \sum_{j=1}^m |s_j - s'_j|.$$

Consequently, Assumptions 3 and 2 are satisfied.

5. Generalized averages: The case where  $r = -\infty$  corresponds to Tippett's method above. Similarly,  $r = \infty$  corresponds to the maximum of p-values, for which the proof follows by similar steps. For  $r \in [\frac{1}{m-1}, \infty)$ ,  $a_{r, m}$  can be chosen such that the test  $T_\alpha$  in defined in Section 3.1 has precise level:  $\mathbb{P}_0 T_\alpha = \alpha$ , see Proposition 2 and 3 in [48]. For such  $a_{r, m}$ , the set  $\{a_{r, m} : r \in [\frac{1}{m-1}, \infty)\}$  is bounded (see Table 1 in the aforementioned paper). This test can easily be seen to be of the form (3) and for the generalized average, we have  $(m^{-1} \sum_{j=1}^m (s_j)^r)^{1/r} = \|m^{-1/r} s\|_r$ , which yields

$$m^{-1/r} \left| \|s\|_r - \|s'\|_r \right| \leq m^{-1/r} \|s - s'\|_r \leq \max_j |s_j - s'_j|,$$

so Assumption 2 is satisfied since  $a_{r, m}$  is bounded.

□

**Proof of Lemma 2 Product of e-values:** The e-value test  $T_\alpha$  for the combination function  $(e_j) \mapsto \prod_{j=1}^m e_j$  can be written as

$$T_\alpha = \mathbb{1}\left\{\sum_{j=1}^m \log E^{(j)} \geq \log(1/\alpha)\right\}.$$

For  $S^{(j)} := \log E^{(j)}$  and  $C_m(s) = \sum_{j=1}^m s_j$  note that  $E_0|\log E^{(j)}| < \infty$  and  $C_m$  satisfies (3). Since  $\alpha \mapsto \log(1/\alpha)$  is strictly decreasing on  $(0, 1)$ , the assumptions of Theorems 1 and 3 are met.

**Average of e-values:** Since  $E^{(j)}$  is nonnegative, the moment condition is satisfied. The map  $(e_j) \mapsto m^{-1} \sum_{j=1}^m e_j$  satisfies (3), while the map  $\alpha \mapsto \alpha^{-1}$  is strictly decreasing and independent of  $m$ . Hence the conditions of Theorems 1 and 3 are satisfied. □

## A.6 Additional simulations

Figure A.6 shows the further improvement of the combined chi-square tests compared to the directional methods as  $d$  grows with respect to the number of trials, for signals that are around the detection threshold. Figure A.6 shows the further worsening of performance of the combined chi-square tests compared method as  $m$  grows with respect to the dimension, for signals that are around the detection threshold. For each of these simulations, 10,000 repetitions for every value  $\alpha \in \{0.01, 0.02, \dots, 0.99\}$  of the level of the tests are considered.

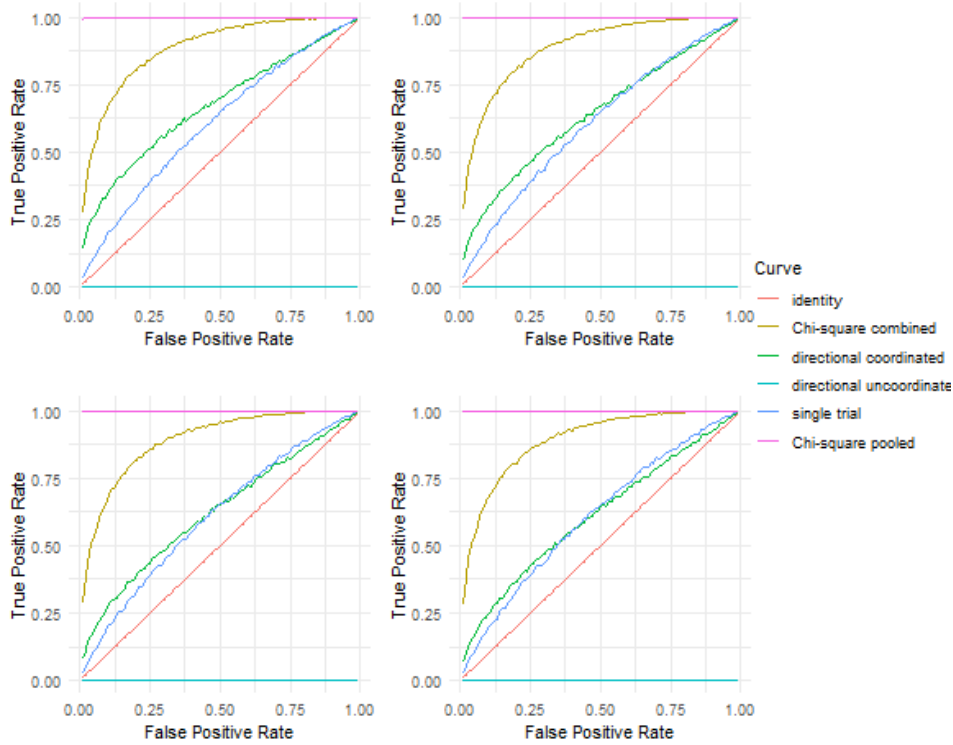

Figure 2: ROC curves for different values of  $d$ , whilst keeping  $m = 20$ ,  $n = 30$ ,  $\rho^2 = 9\sqrt{d}/(16n)$ . From left to right, top to bottom:  $d = 30$ ,  $d = 60$ ,  $d = 90$ ,  $d = 120$ . The uncoordinated directional test requires  $m \geq d$  and is therefore has TPR set to 0.

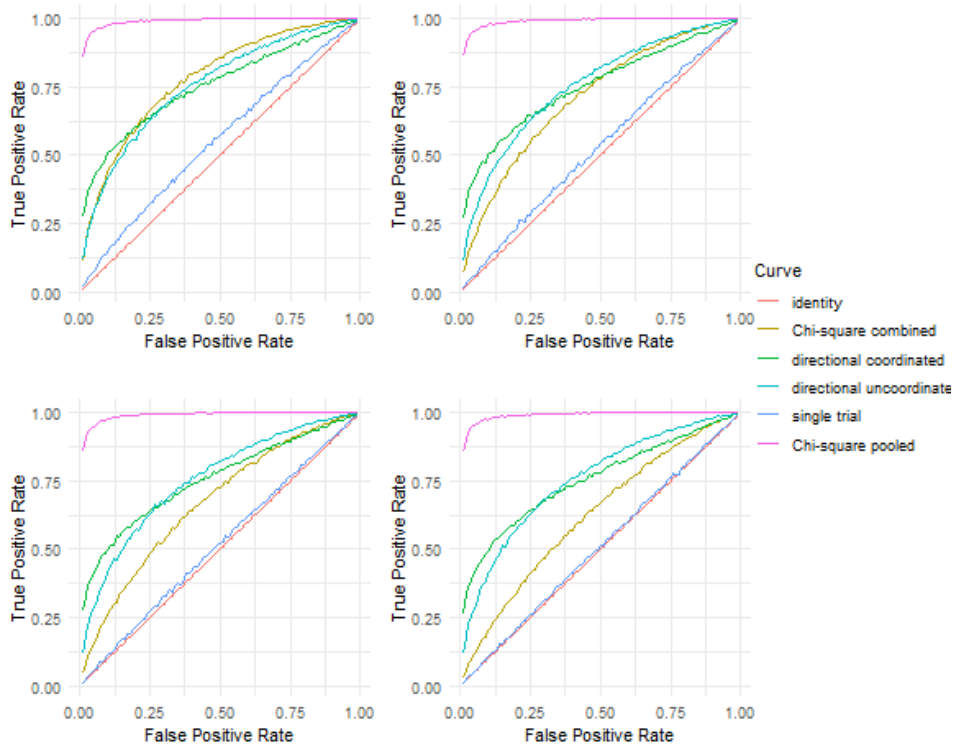

Figure 3: ROC curves for different values of  $m$ , whilst keeping  $d = 5$ ,  $n = 30$ ,  $\rho^2 = 9d/(16nm)$ . From left to right, top to bottom:  $m = 30$ ,  $m = 60$ ,  $m = 100$ ,  $m = 200$ .
